# Supplementary material for: Genome Analysis Identified Novel Candidate Genes for Ascochyta Blight Resistance in Chickpea Using Whole Genome Re-sequencing Data
Source: PubMed Central journal article supplement (PMC5355423; doi:10.3389/fpls.2017.00359), 2017-03-17
Supplement: Data_Sheet_1.pdf [file Data_Sheet_1.pdf]

## *Supplementary Material*

### **Genome analysis identified novel candidate genes for ascochyta blight resistance in chickpea using whole genome re-sequencing data**

**Yongle Li, Pradeep Ruperao, Jacqueline Batley, David Edwards, Jenny Davidson, Kristy Hobson, Tim Sutton\***

\* **Correspondence:** Corresponding Author: Tim.Sutton@sa.gov.au

Supplementary Table 1, Material used in this study

| Name           | Type   | Release date | AB category | Attributes                  | Mapped seq.depth |
|----------------|--------|--------------|-------------|-----------------------------|------------------|
| Tyson          | Desi   | 1978         | ABS         | Wide adaptation             | 2.28             |
| Opal           | Kabuli | 1979         | ABS         | NA                          | 2.27             |
| Macarena       | Kabuli | 1984         | ABS         | Large seed                  | 2.14             |
| Amethyst       | Desi   | 1987         | ABS         | Harvestability              | 2.17             |
| Garnet         | Kabuli | 1987         | ABS         | Large seed                  | 2.36             |
| Dooen          | Desi   | 1988         | ABS         | Yield                       | 2.18             |
| Kaniva         | Kabuli | 1988         | ABS         | Yield                       | 2.72             |
| Narayan        | Kabuli | 1989         | ABS         | Flour yield                 | 2.17             |
| Sensen         | Desi   | 1989         | ABS         | Large seed                  | 2.71             |
| Barwon         | Desi   | 1991         | ABS         | PRR resistance              | 2.65             |
| Norwin         | Desi   | 1992         | ABS         | PRR resistance              | 2.73             |
| Desavic        | Desi   | 1993         | ABS         | Yield                       | 1.79             |
| Lasseter       | Desi   | 1996         | ABS         | Yield, large seed           | 2.49             |
| Bumper         | Kabuli | 1997         | ABS         | Large seed                  | 2.81             |
| Gully          | Desi   | 1997         | ABS         | Virus resistance            | 2.19             |
| Heera          | Desi   | 1997         | ABS         | Yield                       | 2.14             |
| Sona           | Desi   | 1997         | ABS         | Yield                       | 2.41             |
| Jimbour        | Desi   | 2000         | ABS         | PRR resistance              | 1.87             |
| Howzat         | Desi   | 2001         | ABS         | Yield,w ide adaptation      | 2.36             |
| Moti           | Desi   | 2003         | ABS         | Yield, earliness            | 1.66             |
| KimberleyLarge | Kabuli | 2004         | ABS         | Yield, large seed           | 2.18             |
| Rupali         | Desi   | 2004         | ABMS        | Chilling tolerance          | 1.73             |
| Sonali         | Desi   | 2004         | ABMS        | Chilling tolerance, FW      | 2.02             |
| SONALI_A       | Desi   | 2004         | ABMS        | Chilling tolerance, FW      | 1.73             |
| Almaz          | Kabuli | 2005         | ABMR        | Yield                       | 2.36             |
| Flipper        | Desi   | 2005         | ABR         | ABR                         | 2.13             |
| Genesis090     | Kabuli | 2005         | ABR         | Yield, ABR                  | 1.98             |
| Genesis509     | Desi   | 2005         | ABR         | Yield, wide adaptation, ABR | 2.43             |
| Genesis510     | Desi   | 2005         | ABR         | Yield, wide adaptation, ABR | 2.37             |
| Genesis836     | Desi   | 2005         | ABMS        | FW                          | 2.25             |
| Kyabra         | Desi   | 2005         | ABS         | Yield, PRR resistance       | 2.14             |
| Nafice         | Kabuli | 2005         | ABMR        | Yield, large seed           | 2.51             |
| Yorker         | Desi   | 2005         | ABMS        | PRR resistance              | 2.12             |
| YORKER_A       | Desi   | 2005         | ABMS        | PRR resistance              | 1.74             |

## Supplementary Material

|               |           |      |       |                             |       |
|---------------|-----------|------|-------|-----------------------------|-------|
| Genesis079    | Kabuli    | 2009 | ABMR  | Yield, wide adaptation      | 2.24  |
| PBAHatrick    | Desi      | 2009 | ABMR  | ABMR, PRR resistance        | 2.29  |
| PBASlasher    | Desi      | 2009 | ABR   | Yield, ABR, seed quality    | 1.89  |
|               |           |      | ABMR/ |                             |       |
| Genesis114    | Kabuli    | 2010 | MS    | Yield, medium to large seed | 2.28  |
|               |           |      | ABMR/ |                             |       |
| GENESIS114_A  | Kabuli    | 2010 | MS    | Yield, medium to large seed | 1.49  |
| GenesisKalkee | Kabuli    | 2011 | ABS   | Yield, large seed           | 2.37  |
|               |           |      |       | Yield, wide adaptation,     |       |
| PBABoundary   | Desi      | 2011 | ABMR  | ABMR                        | 2.58  |
| PBAPistol     | Desi      | 2011 | ABS   | Yield, early flowering      | 2.28  |
| Ambar         | Desi      | 2012 | ABR   | ABR, early flowering        | 2.76  |
| Neelam        | Desi      | 2012 | ABR   | ABR, wide adaptation        | 2.91  |
|               |           |      |       | Yield in short seasons,     |       |
| PBASTriker    | Desi      | 2012 | ABMR  | ABMR                        | 2.13  |
| PBAMaiden     | Desi      | 2013 | ABR   | Large seed                  | 2.73  |
| PBAMonarch    | Kabuli    | 2013 | ABMS  | Early flowering             | 2.68  |
| PBAsamer(CIC  |           |      |       |                             |       |
| A912)         | Desi      | 2016 | ABR   | PRR resistance, ABR         | 2.24  |
| AB001         | Desi      | NA   | NA    | NA                          | 0.65  |
| AB002         | Desi      | NA   | ABR   | NA                          | 5.65  |
| AB015         | Desi      | NA   | NA    | NA                          | 7.76  |
| AB019         | Desi      | NA   | NA    | NA                          | 10.37 |
| AB022         | Desi      | NA   | ABMR  | NA                          | 1.90  |
| AB023         | Desi      | NA   | ABR   | NA                          | 2.45  |
| AB024         | Desi      | NA   | NA    | NA                          | 8.04  |
| AB034         | Desi      | NA   | NA    | NA                          | 7.20  |
| DICC8022      | Desi      | NA   | ABMR  | NA                          | 5.10  |
| DICC8174      | Desi      | NA   | ABMR  | NA                          | 5.48  |
| DICC8196      | Desi      | NA   | ABR   | NA                          | 5.86  |
| DICC8212      | Desi      | NA   | ABMR  | NA                          | 7.06  |
| DICC8220      | Desi      | NA   | ABR   | NA                          | 7.46  |
| DICC8296      | Desi      | NA   | ABR   | NA                          | 5.41  |
| DICC8310      | Pea       | NA   | ABR   | NA                          | 6.16  |
| ICC1882       | Desi      | NA   | NA    | NA                          | 4.54  |
| ICC283        | Desi      | NA   | NA    | NA                          | 3.54  |
| ICC4958       | Desi      | NA   | NA    | NA                          | 4.03  |
| ICC8261       | Kabuli    | NA   | NA    | NA                          | 4.52  |
|               | C.reticul |      |       |                             |       |
| PI489777      | atum      | NA   | NA    | NA                          | 3.52  |
| WACPE2160     | Desi      | NA   | ABR   | NA                          | 8.09  |

ABS: ascochyta blight susceptible. ABMS: ascochyta blight medium susceptible. ABMR: ascochyta blight medium resistance. ABR: ascochyta blight resistance. PRR: Phytophthora root rot resistance. FW: Fusarium wilt

Supplementary Table 2, Primer sequences for qPCR

| Gene ID  | Sense Primer                 | Anti-sense Primer            |
|----------|------------------------------|------------------------------|
| Ca_05511 | GCTGCTCCTCCTCCCTTC           | TCGTTGACAATGCGGATGAC         |
| Ca_05512 | AGAGAAGAGAAGGCAGTATGAC<br>AG | GGCTGAGATGGTAGTCTTGATA<br>GG |
| Ca_05513 | GTCTTTATCACCCATCATCAC        | CAGCAACCGAGGTATATCC          |
| Ca_05514 | CTTCATTACCAAGAACACCAC        | AACAATTCCTCATCATCCATATC      |
| Ca_05515 | CTGAAGCAATAGACGGTAG          | CAGCAGTCCATTCCTCTC           |
| Ca_05516 | CAAGATGGAAGTCTCGTGGCAGT<br>G | TTCCTCGCCGTTCCCGTTCG         |
| Ca_05517 | TGACAGTGGTGAGTTTATGGTG       | GAAAGGGTTTGGGCGGTATC         |
| Ca_05520 | GGAGAGTAGAACAGTTTG           | ATGTAGATAAGCCAATGC           |
| Ca_05521 | GTTGCCTTAGAGACTGCTAC         | ACCTGGTGTTCCTTGTGG           |
| Ca_05522 | CGAGATGGACGAGAAGTTG          | TATTCATACACAAGCAGTAGTTC      |
| Ca_05523 | ACGAACACAATTACAGGAGAG        | GGCAGTAGCAGTTTCTATGG         |

Supplementary Table 3, Percentage of genome under selection

| Chromosome | Total length (kb) | D>2 (kb) | % D>2    | D<-2 (kb) | % D<-2   |
|------------|-------------------|----------|----------|-----------|----------|
| Ca1        | 49000             | 5500     | 11.22449 | 500       | 1.020408 |
| Ca2        | 37000             | 1600     | 4.324324 | 100       | 0.27027  |
| Ca3        | 67000             | 1200     | 1.791045 | 300       | 0.447761 |
| Ca4        | 59000             | 6500     | 11.01695 | 300       | 0.508475 |
| Ca5        | 69000             | 100      | 0.144928 | 100       | 0.144928 |
| Ca6        | 67000             | 1500     | 2.238806 | 1000      | 1.492537 |
| Ca7        | 56000             | 2400     | 4.285714 | 0         | 0        |
| Ca8        | 20000             | 1300     | 6.5      | 500       | 2.5      |
| total      | 424000            | 20100    | 4.740566 | 2800      | 0.660377 |

Supplementary Table 4, Predicted genes located on chromosome 4 (Ca4: 15,855,018..15,980,584)

---

| Kabuli<br>reference<br>genome 1.0 | NCBI LOC     | Annotation                         |
|-----------------------------------|--------------|------------------------------------|
| Ca_05523                          | LOC101515334 | serine/threonine protein kinase    |
| Ca_05522                          | LOC101488413 | serine/threonine protein kinase    |
| Ca_05521                          | LOC101488744 | serine/threonine protein kinase    |
| Ca_05520                          | LOC101489079 | wall-associated kinase             |
| Ca_05519                          | LOC101489412 | uncharacterized protein            |
| Ca_05518                          | LOC101489732 | uncharacterized protein            |
| Ca_05517                          | LOC101490487 | serine/threonine protein kinase    |
| Ca_05516                          | LOC100785979 | cysteine-rich receptor-like kinase |
| Ca_05515                          | LOC105851082 | LRR receptor-like kinase           |
| Ca_05514                          | LOC101490811 | uncharacterized protein            |
| Ca_05513                          | LOC101491135 | uncharacterized protein            |
| Ca_05512                          | LOC101491667 | uncharacterized protein            |
| Ca_05511                          | LOC101491977 | zinc finger protein                |

---

Supplementary Table 5, Information of the 21 SNPs significantly associated with AB resistance

| SNP           | Chr. | Position_Ref<br>1.0 | P.value  | Upstream 100bp sequence                                                                                           | Downstream 100bp sequence                                                                                         |
|---------------|------|---------------------|----------|-------------------------------------------------------------------------------------------------------------------|-------------------------------------------------------------------------------------------------------------------|
| Ca00000335415 | 4    | 15961111            | 1.46E-05 | ATCCTTTTGAGTTTATTTTCTCACACG<br>CCTTGACAAGCAAGTGACCAATTACT<br>GAATTTTAACCAGCATATTTAAGTTG<br>AACCATCTTTTCATTTATATG  | GTGTAAGCTTGATTAATCCAATTAGA<br>GAAATGTACAAGTTTTAACATAAAGA<br>AATTTAGCCCTTCTCAAGCATGTTGGG<br>ACCAGGGAGTTTAATTTGTTCC |
| Ca00000335663 | 4    | 16027381            | 1.67E-05 | ACCCATGGCGCAGCACGGTAACAAA<br>CAACCTCAAACACAATTAATTAGATG<br>TTTAATTATGTCTCAATTCATTTGTT<br>TTTTTTGTTGTTGTTGTTGTTGC  | CTGCAAATTGTAACTATTTGTCTTGGT<br>TAATTTTAAAGTCCATTTTCTAATGCA<br>TTGCATATATAGAAATTGGTTTTGTTT<br>AATTTTGGCTTTTTGCGTTG |
| Ca00000335607 | 4    | 15996386            | 1.98E-05 | TGCGCCTTGAAGATCTTAGATGTGAA<br>ATTGAATATTTGTTTGTGATGATTTT<br>GACTGTGAAATTCAACATTTGAGCCT<br>CGATTACTCTCTTAAGTGTGAA  | AAATTTGGTATATAAATTTTCCTTAGA<br>ATGATGCTTGTTTGAATGTTAAACAAG<br>TGATTTTGAAAGTAAATTGTCCTTTT<br>GATTTTCGAGAAGGTCTACGA |
| Ca00000335608 | 4    | 15996485            | 2.21E-05 | AAAATTTGGTATATAAATTTTCCTTA<br>GAATGATGCTTGTTTGAATGTAAAC<br>AAGTGATTTTGAAAGTAAATTGTCCC<br>TTTTGATTTTCGAGAAGGTCTACG | GAGATGACAAACAAAATTTTCAAAA<br>GATTTTTTTGAAAATAAATGATGGA<br>AATCAGAAAGTTTGTGGAAATTTCTA<br>CCGTGGTTGAACAAGATATTT     |
| Ca00000335697 | 4    | 16031842            | 2.25E-05 | CTAAGTAACGTTTTAATTAATAATAT<br>GAAGACTAATTTAAATTTGTAACCTT<br>GTCTAGAATAAAGCTATGGATATTT<br>TCAAACTAACTTGGTCTAATC    | CTATCTAATCATTTTTTCCTTGAATTAA<br>TAATCACCTTCACATGATATTATAATA<br>CATAACATGAACTAAAATCATAG<br>GATTCGATCTTAAAATGAAAT   |

|               |   |          |          |                                                                                                                      |                                                                                                                     |
|---------------|---|----------|----------|----------------------------------------------------------------------------------------------------------------------|---------------------------------------------------------------------------------------------------------------------|
| Ca00000335831 | 4 | 16052515 | 2.30E-05 | TTATGAATAGAAATAACACAAATTGC<br>TTGAATATTCGAGAGATCTTGGATAT<br>CTCCCAAATTCTTATTCCAACAATATC<br>TCTCAATCCCCTATTACTATTG    | GATCAACAGGCCTTATTGATCTCTTCT<br>AAATATCTCAGCCTAAATATTTGGAG<br>TTATAATACTCCCCCAACCCCTGAA<br>CATTCACCTTGTCTTAAGGC      |
| Ca00000335819 | 4 | 16050152 | 2.34E-05 | TATCTACCCAAGTTATGATTATGCTC<br>ACTGCATTGTGGATTCGCTTGAGAAT<br>ATCACACACTCAGTAAGTTTCATCCA<br>CTAAATTGTGTTATATTA AAAAAT  | TAATGATTTTTGTAGATATTTCCCCTT<br>TGACAAAGTTGATAATGCCTGGATAC<br>CTCAAGTCTGCTGGACGTCTAAATTCT<br>CTTTCTGCATTGATATATTTA   |
| Ca00000335482 | 4 | 15972941 | 2.49E-05 | CATTTTCATACACACTGGCAGTCATTTT<br>GTTACAACATATGGAATTCATTAAT<br>GTTATTTTCATAAAATTCAAATCAAAT<br>CTCAACTGTTGCGAGTATTGTT   | TGCCAGGAGCTTTTGTGTTTCTTGTA<br>AAATGGGGATTTAAAATTCACGGTTC<br>AGTGCTGAAATATGAATTTAAAATAT<br>AAAATTGATGTGTGAGTTTCTT    |
| Ca00000335321 | 4 | 15943658 | 2.56E-05 | CTTCAACCTTGTGAAGTCTCAGA<br>AAAGCCTGGCACACATATATTTGCTG<br>TTTATGGTCTGAATAATTTTTTTGCTT<br>CATTGTTCTTTGGCTTGTTTGG       | GGATGTTTTTTTCACGTAAACTAATTCA<br>AGTTGATATTGTTTAGGTGATAACTTC<br>TTCAAGACTGCTAGCTATAACAATTGA<br>AGCAGTTTGTGCGAAATCACA |
| Ca00000335478 | 4 | 15972622 | 2.56E-05 | ATAGCATAAACATAGCAATAATGAAT<br>GGCTTATTTTGAAAATTA AAAACCACA<br>TAAGAAAAGTTCGAGTTAATATGAAA<br>ACTTTAGGAGTGAAA ACTTCTCA | ATTGTAAGAATTATACCAAACAGATA<br>GGTTTCGGAGCAACAGAAAATCCAAT<br>TAAATACAATCCTCCACCAGACATTC<br>AATAACTTTGACCAACCAATCC    |
| Ca00000335820 | 4 | 16050372 | 2.60E-05 | TTTTAAATTATATCAATCATCCCGAAT<br>ATATTTGATATAATGTGTACTTTTGGG<br>CAGTATACATTGTACTATTCATTATA<br>GCAGTTGGAGTTTTGTTGCTG    | GCGATAAGTGAGCTATGTACAATTCA<br>GTGATGTAATGGTTTTTCATATAGTATT<br>TTATGCACAACACTCCATAGCAAATT<br>GGCTCTGTTTTTTTTTTTTTTT  |

---

|               |   |          |          |                                                                                                                     |                                                                                                                    |
|---------------|---|----------|----------|---------------------------------------------------------------------------------------------------------------------|--------------------------------------------------------------------------------------------------------------------|
| Ca00000335315 | 4 | 15942039 | 2.66E-05 | TACAGTCAGACCCCTTCCAATTGGAA<br>CATCAGTTAGTGGAAAGGTTCTCACC<br>TTCTACACGATGAATGAAGCAATACA<br>GTAATCTTTCTGGTGCCTATTTA   | ATTCTTGTTCAACTTATGTGACAATTT<br>GTTGCAGGTAGAGAAGCAATGTGCTC<br>ATTTTTTTGGTGTGACAATAAATGAGC<br>AGCAAGCTGAGTCAGGGATTG  |
| Ca00000335316 | 4 | 15942209 | 2.70E-05 | ATAAATGAGCAGCAAGCTGAGTCAG<br>GGATTGTAGTAAGAGTTACTTCAACT<br>GCACAAAGCAAATTCAAGGTATCAAT<br>GACGCCTTTTTTACAAATATTCCT   | TCTGTCTTTGTCTCTTTGTCTGTTGCAT<br>TTTTGCTTCCGGTTAATATGATGTTGG<br>ATTATAATATTGAAGGCTGATTTTTCA<br>GTTGCTCTATTTTCGAACAA |
| Ca00000335325 | 4 | 15944195 | 2.70E-05 | TCTGCTCCATTAAGTTGTAGCAAGCT<br>GGATCAGTTGCAGGTTTTGCTCACCT<br>GGCTTACATGACTGGCCGATAATCTG<br>TAGCAATCACGTATTATAATTTG   | GACATTTGATAGAGCAAAGGAAACA<br>ACTCAGCTGTCGAGCCATACCTTATTT<br>TGGCCTTTAATATACATTGTTATGTGA<br>ATATGTTGTACATAATGTCAA   |
| Ca00000335829 | 4 | 16051721 | 2.70E-05 | CTAGCTTTGATACCTAGCTATATATTC<br>TTGTAGACTTGTATCATTACATAAAC<br>AATCATACTCAGAATATTTAGTTCCGG<br>TTTCTATCTTCATTTTCTCTTA  | ATTTCTGAAACATAATAATGAAGTAA<br>AATTTAAATACTGACAGGTGCCTTTTC<br>CAAATTAATTATTTCACTGTTGACAAT<br>GTGTTCTGTTTGCATAAGTTT  |
| Ca00000335817 | 4 | 16049395 | 2.77E-05 | GTGGATGGGCTGGAAACCATTCAAGG<br>TATGTTTGTGTTGCACCTCTTTTGTGGA<br>TTGTGTGGAAATTGTCCATCCTAGCTT<br>TTTAGATGTTTAAACAGCTTTA | ACACTTGTGCAGATTACTTACACAAG<br>CGATTATTTCCAAGAACTATATGAATT<br>AGCCGTGGAGCTCATTAGAAGAGGTT<br>GTGCTTACGTTGATCATCAGGT  |
| Ca00000335672 | 4 | 16029163 | 2.90E-05 | AAGCGTCGAACACTAAGTAATATTCG<br>AATTCAGATTCATAACATTGTGAGAG<br>TCTAACTTATTCTACTAGACTCAATTT<br>CTGATAGTCTCTATTTCTATCA   | ATATTAACAACATATTATAATTCAAA<br>GCTTATATTTTGAAATTTCCATCATTG<br>GACATGTTATAAGGCAGTACTAGACT<br>ATCATAATTCAAACACTGATGTT |

---

---

|               |   |          |          |                                                                                                                  |                                                                                                                      |
|---------------|---|----------|----------|------------------------------------------------------------------------------------------------------------------|----------------------------------------------------------------------------------------------------------------------|
| Ca00000335172 | 4 | 15925020 | 2.93E-05 | ATAGACGGTAGAAAACAATCACAAA<br>AATCGGACGTGTACTCTTTTGGTGTC<br>TGTTGCTAGAGGTTCTGACAGGGAAG<br>TGTCCTCTGCTGTGGACAATGG  | GTGGAAGTGGTTATGGTGGGGGGGTG<br>ATGGATCTTCCAAGGTGGGTGCAATC<br>AGTAGTTAGAGAGGAATGGACTGCTG<br>AAGTATTTGATTTAGAGTTGATG    |
| Ca00000335193 | 4 | 15929393 | 2.99E-05 | GGTTTTAGAGCAAATATCTTTAAAT<br>TAAATTTTGAATTTTTTTTATAAATTA<br>AAAAATAAAATAATTAATTTATACTG<br>AAAAAAGTATGCAAATAAAAT  | TTATAAATTAATTAATAAAATTTGAGA<br>TTGTTGGTGAATAGAATCAAAGCAGA<br>TGATATAATTTGTTGAGATATTTTTGT<br>TACATAAAAATAAAATAAAAAA   |
| Ca00000335488 | 4 | 15973984 | 3.23E-05 | AGAGGATATCAAAGAGGCGGCGGC<br>ACGTGCGTGACCGAGATGACTGTAGT<br>CATAGGCAGTGACTCCACAAACATAC<br>ATAGAAACCTTGCCAGGTTCTATG | GGTTTTGAAAATGTCTTTCTGCTGAGT<br>CAAGGAATTGTAAATCTTCAACTCAA<br>CTCGTTCCTCCGCCATTGCTGCCACTG<br>TCTGCACACAAACGCGTTACA    |
| Ca00000120693 | 4 | 15768013 | 2.40E-07 | TTTTGTACAAGAGAAAATGTAGGTAT<br>TTACAACTTTTTTTCATATAGATAAGT<br>TATTTTCGTCCCTTTATATGAACTGAG<br>AATTTTTTATCTTGAGTGTA | AGATACAGACTAAGTTAGGCCTAATT<br>TTTTTTGGGTTTATTTTCTTCATTTACA<br>AAAAGTTGGGCCCAAATTTTTTTCTGA<br>TGATGAAAGGGCCGAACATGAAC |

---



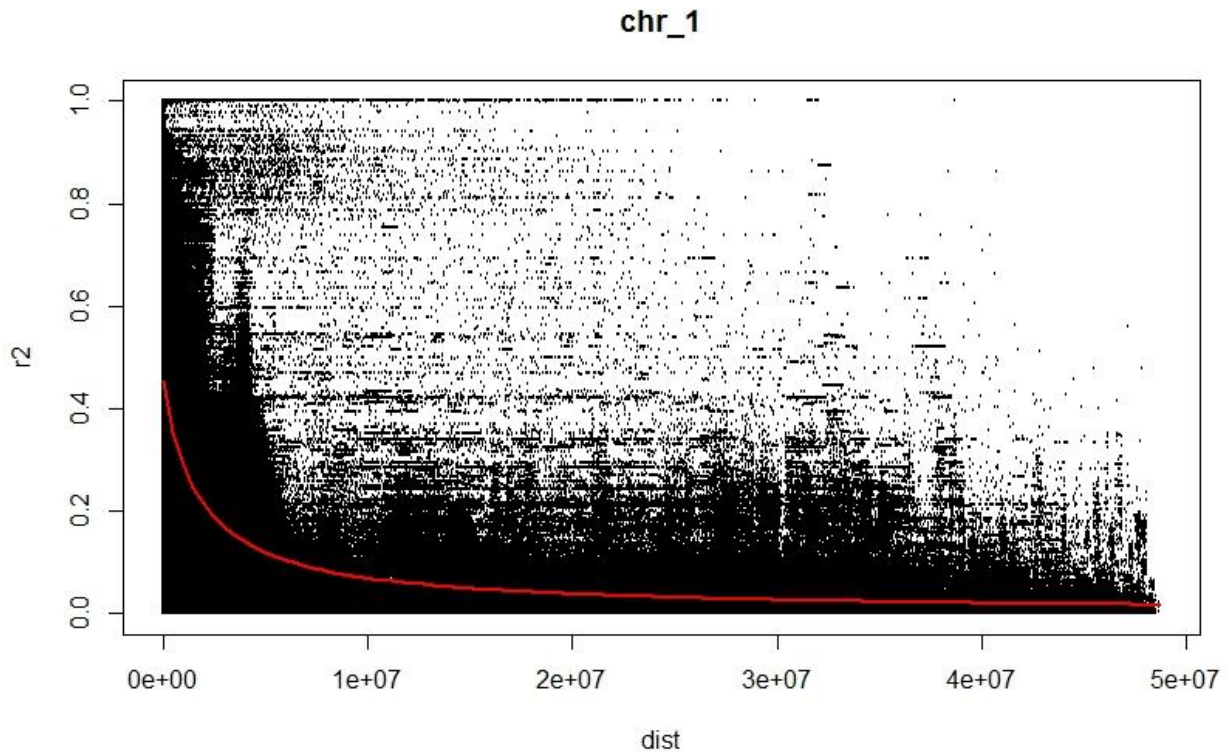

Supplementary Figure 1a **Pair wise LD vs physical distance in chromosome 1.**

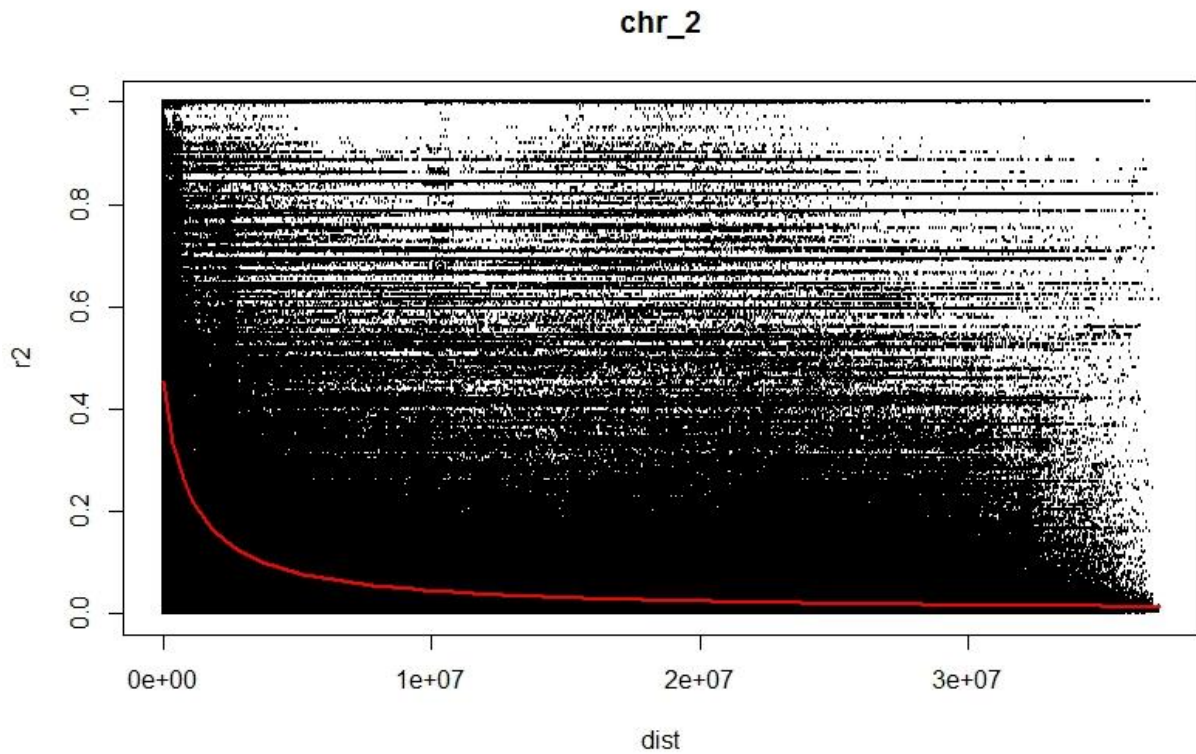

Supplementary Figure 1b **Pair wise LD vs physical distance in chromosome 2.**

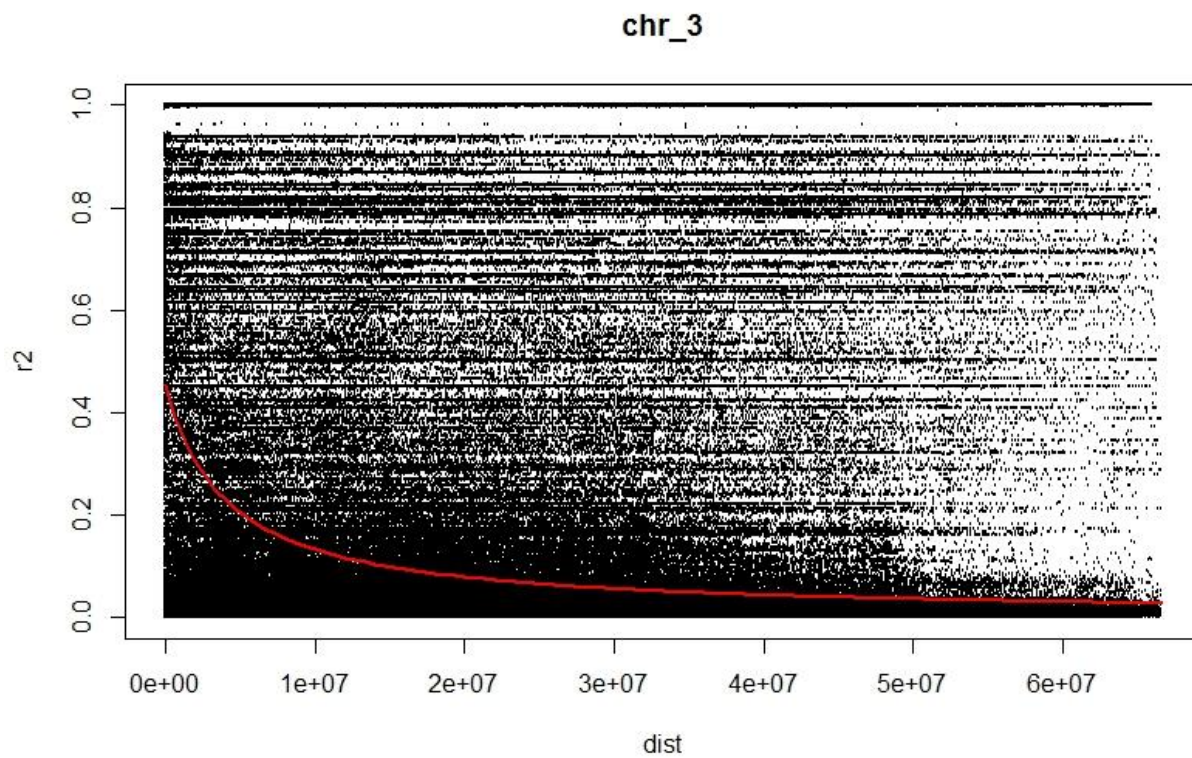Supplementary Figure 1c **Pair wise LD vs physical distance in chromosome 3.**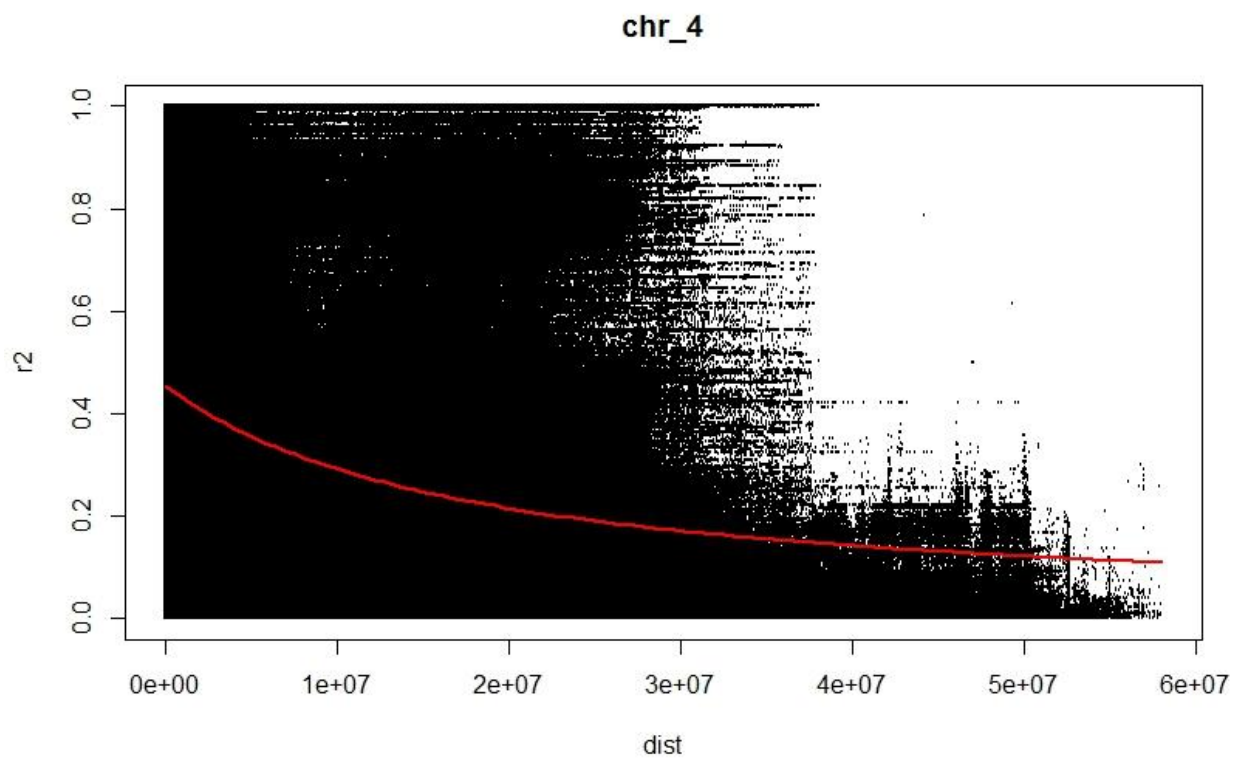Supplementary Figure 1d **Pair wise LD vs physical distance in chromosome 4.**



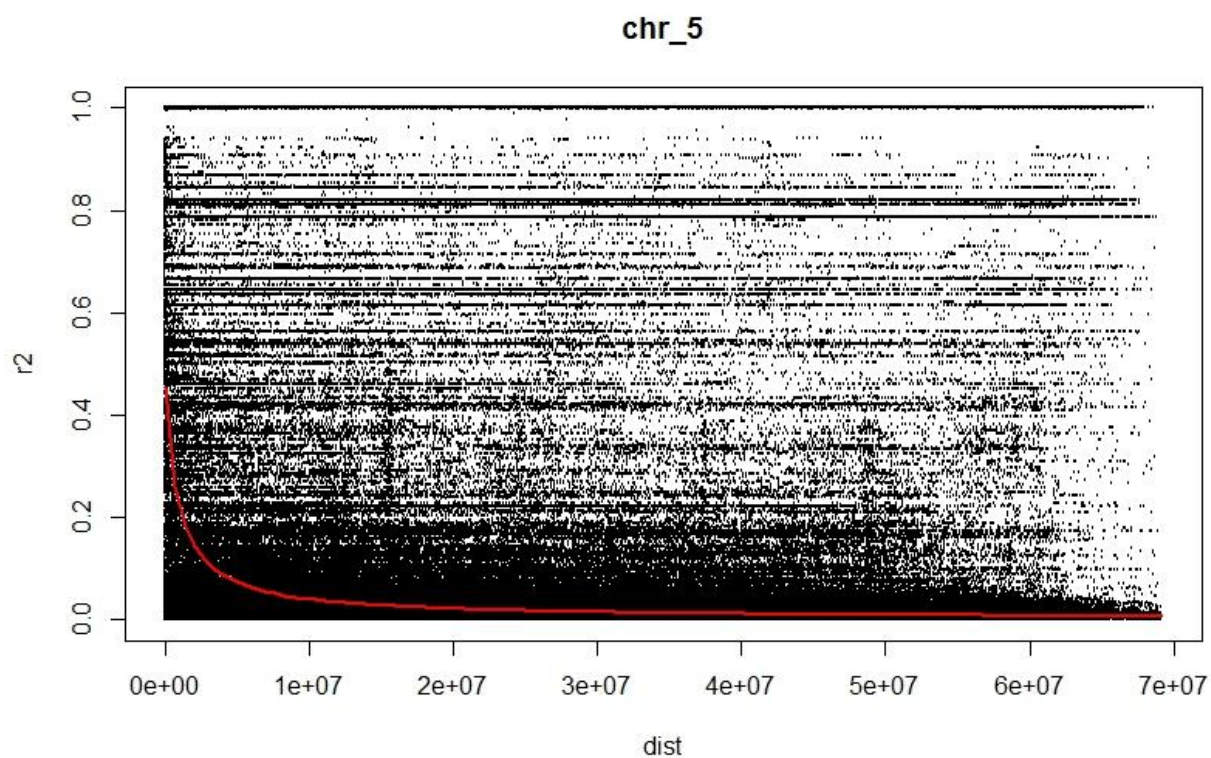

Supplementary Figure 1e **Pair wise LD vs physical distance in chromosome 5.**

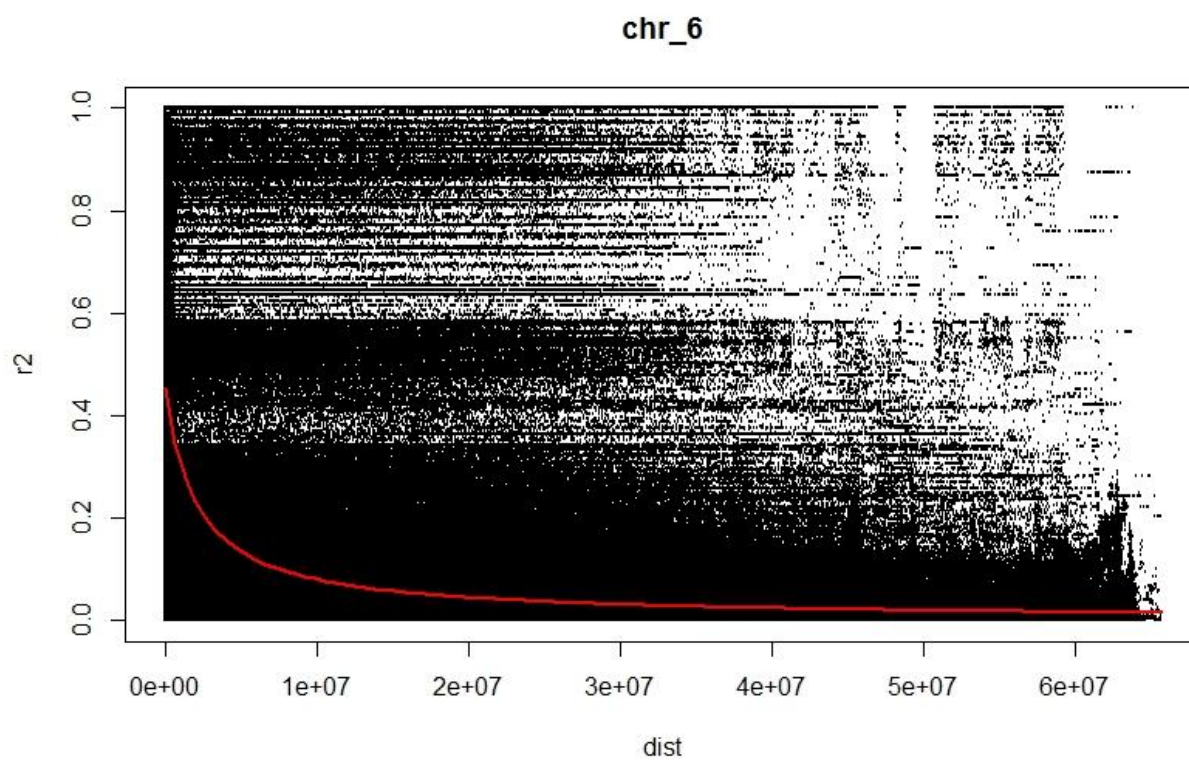

Supplementary Figure 1f **Pair wise LD vs physical distance in chromosome 6.**

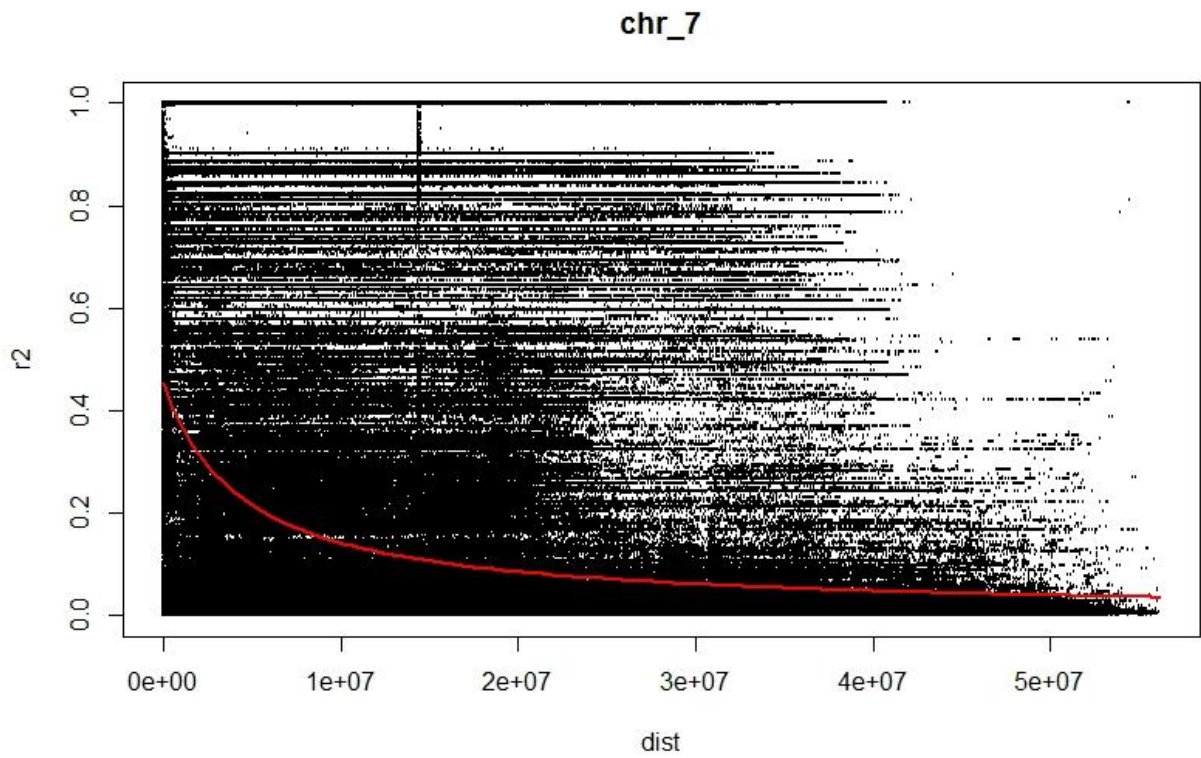Supplementary Figure 1g **Pair wise LD vs physical distance in chromosome 7.**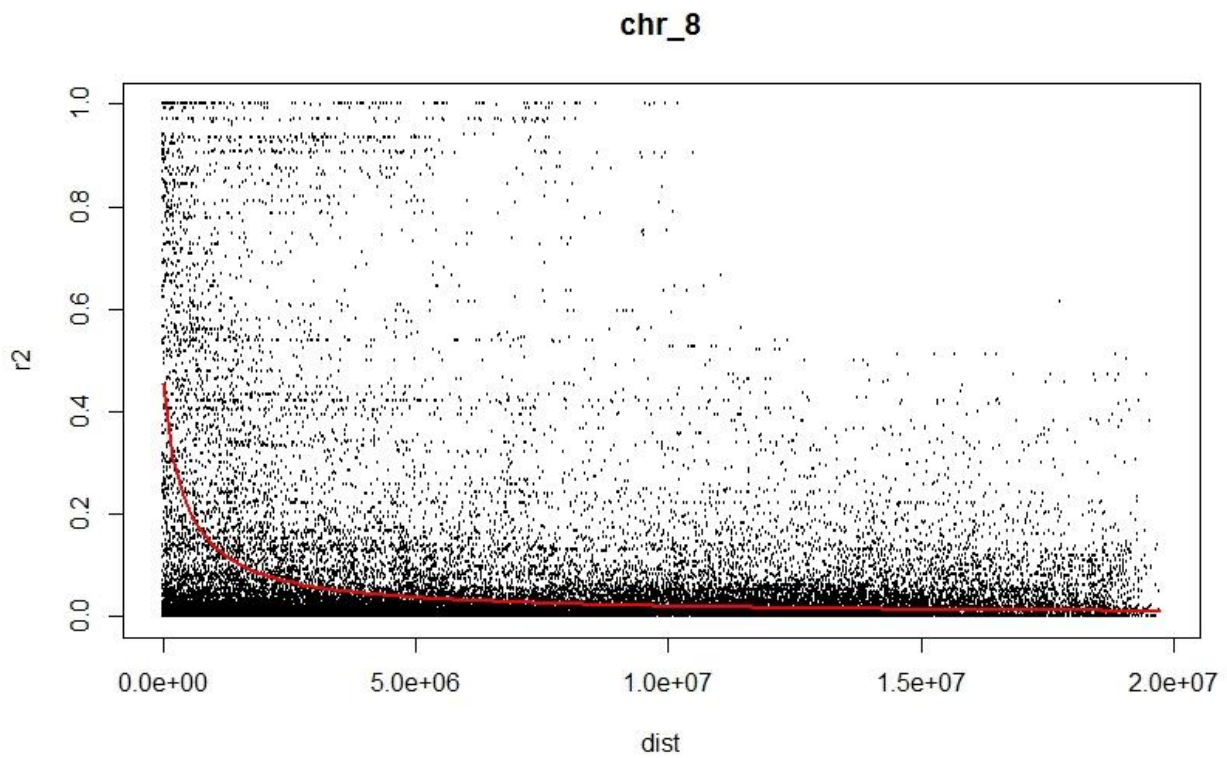Supplementary Figure 1h **Pair wise LD vs physical distance in chromosome 8.**

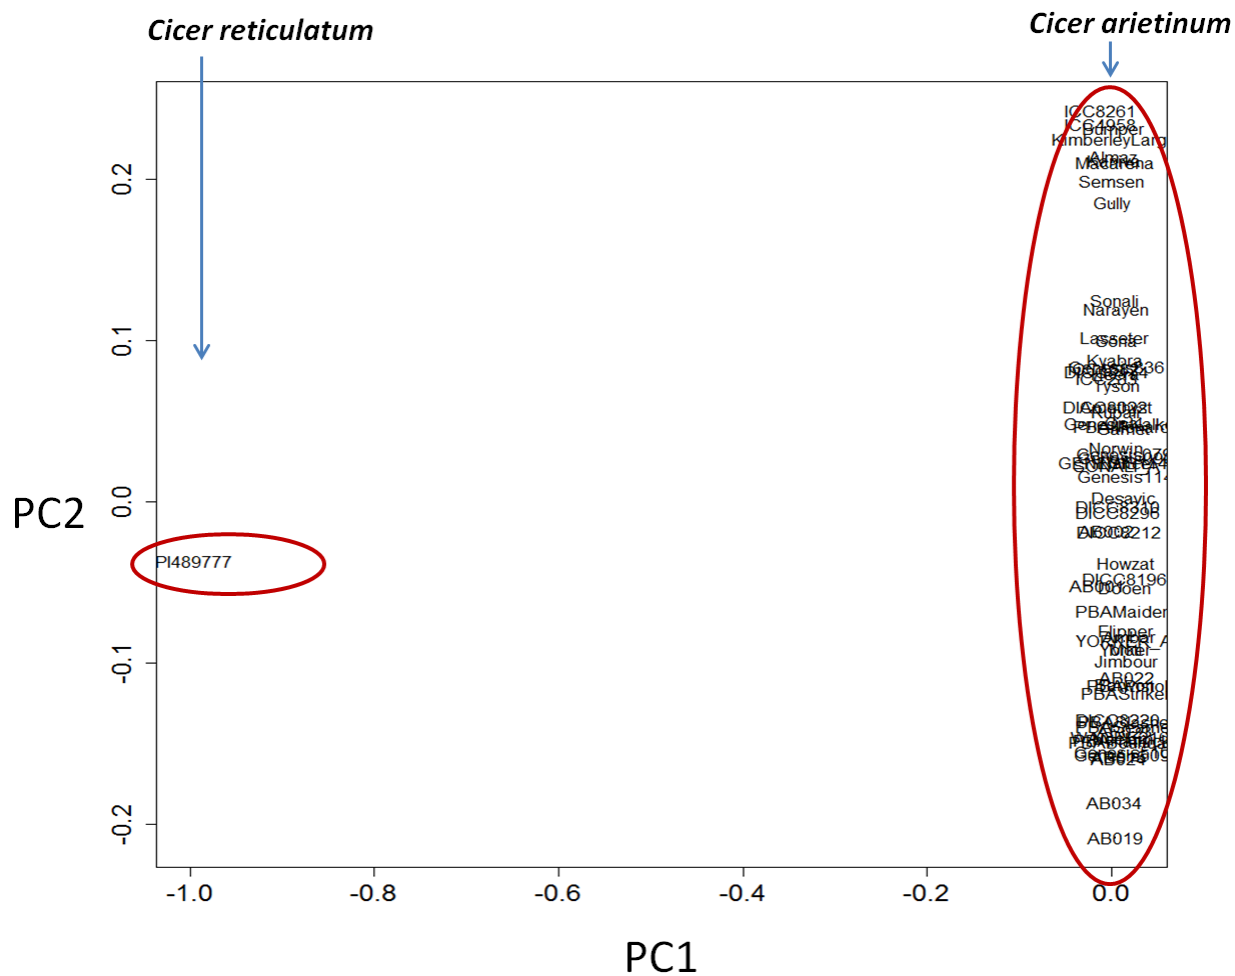

Supplementary Figure 2 The first two PCs in principle component analysis of the 69 chickpea genotypes based on SNPs data

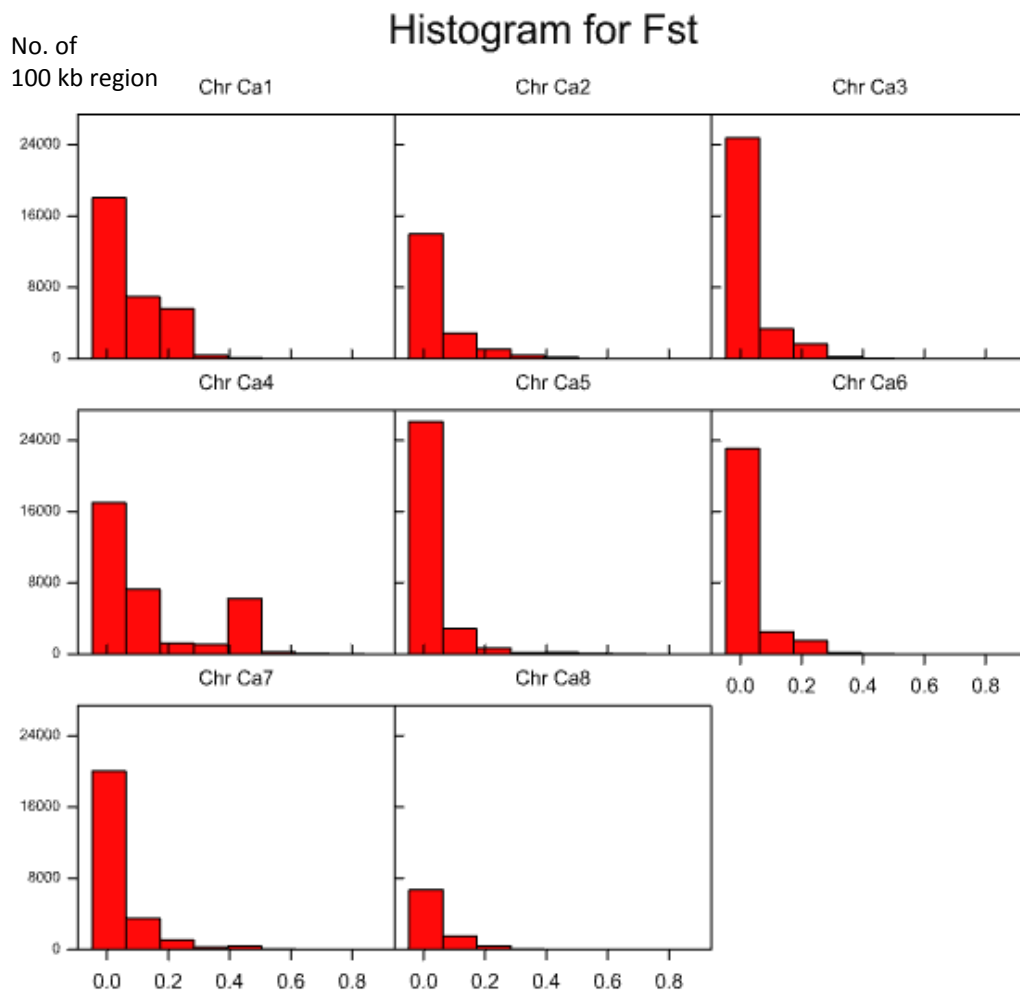

Supplementary Figure 3 **The distribution of Fst value in the eight chickpea chromosomes**

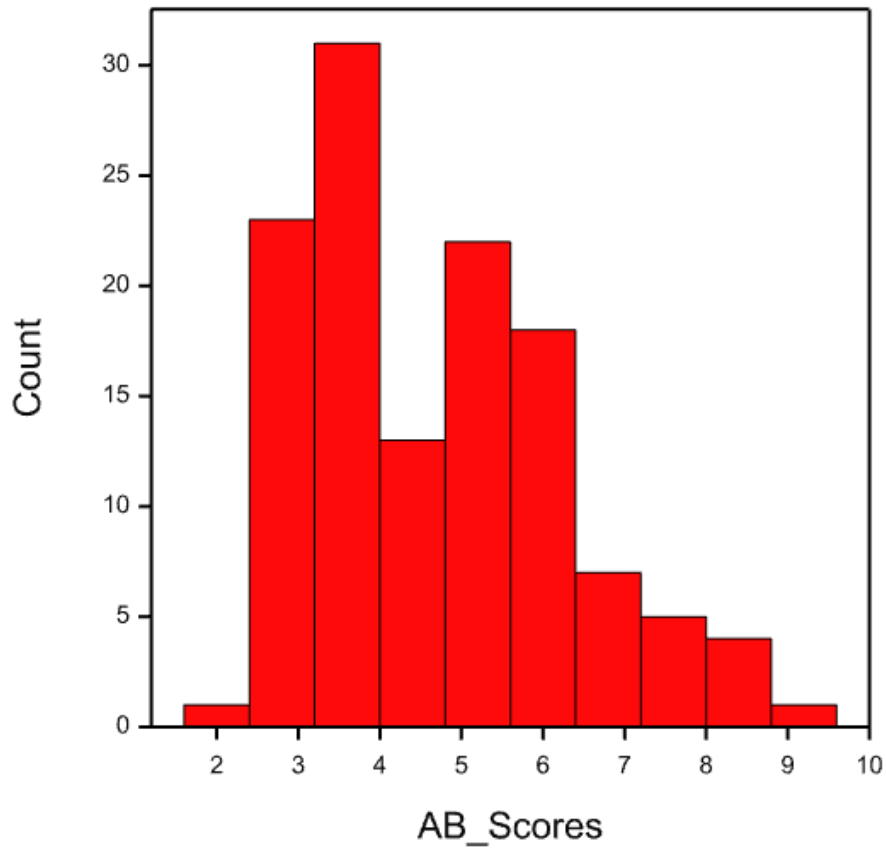

Supplementary Figure 4 **The distribution of AB scores in the validation set**

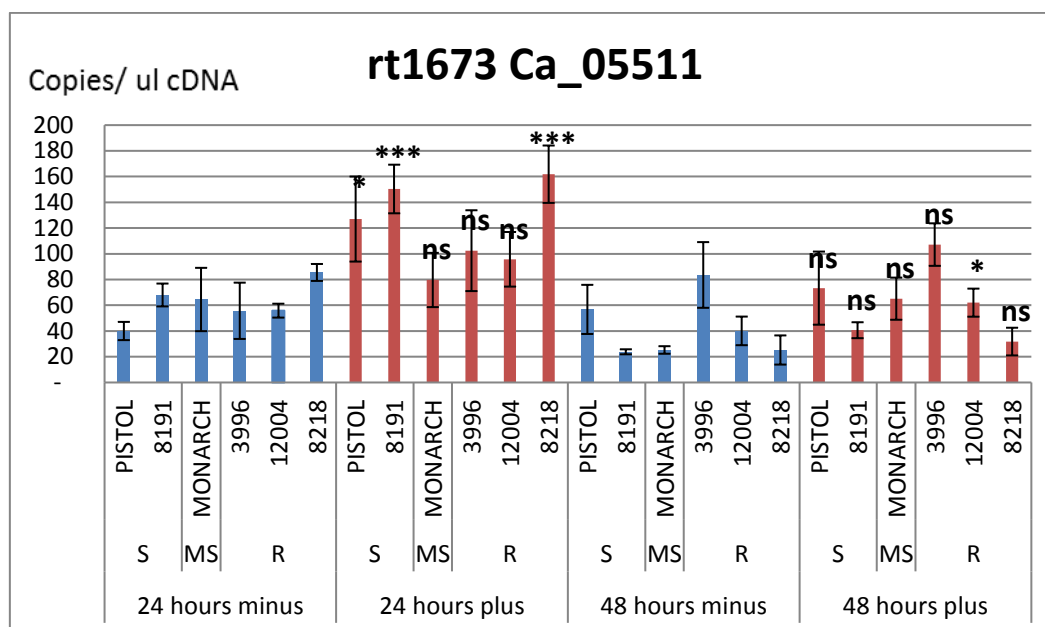

Supplementary Figure 5 **Transcriptional analysis (qPCR) of predicted gene encoding zinc finger protein (Ca\_05511) in AB4.1 region with 6 chickpea lines at two time points.** Blue: non-inoculated; red: inoculated with *A. rabiei*. S: Susceptible; MS: Medium Susceptible; R: Resistant. Significant difference between inoculated and non-inoculated lines are shown as \*\*\* (p-value<0.001), \* (p-value<0.05). ns: non-significant

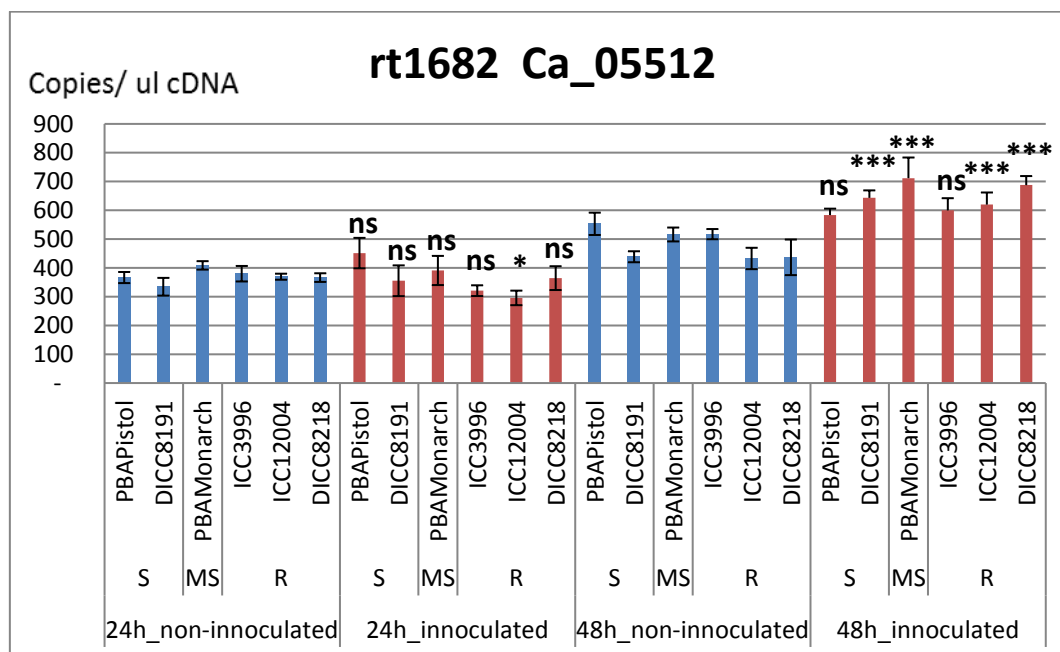

Supplementary Figure 6 **Transcriptional analysis (qPCR) of unknown gene (Ca\_05512) in AB4.1 region with 6 chickpea lines at two time points.** Blue: non-inoculated; red: inoculated with *A. rabiei*. S: Susceptible; MS: Medium Susceptible; R: Resistant. Significant difference between inoculated and non-inoculated lines are shown as \*\*\* (p-value<0.001), \* (p-value<0.05). ns: non-significant



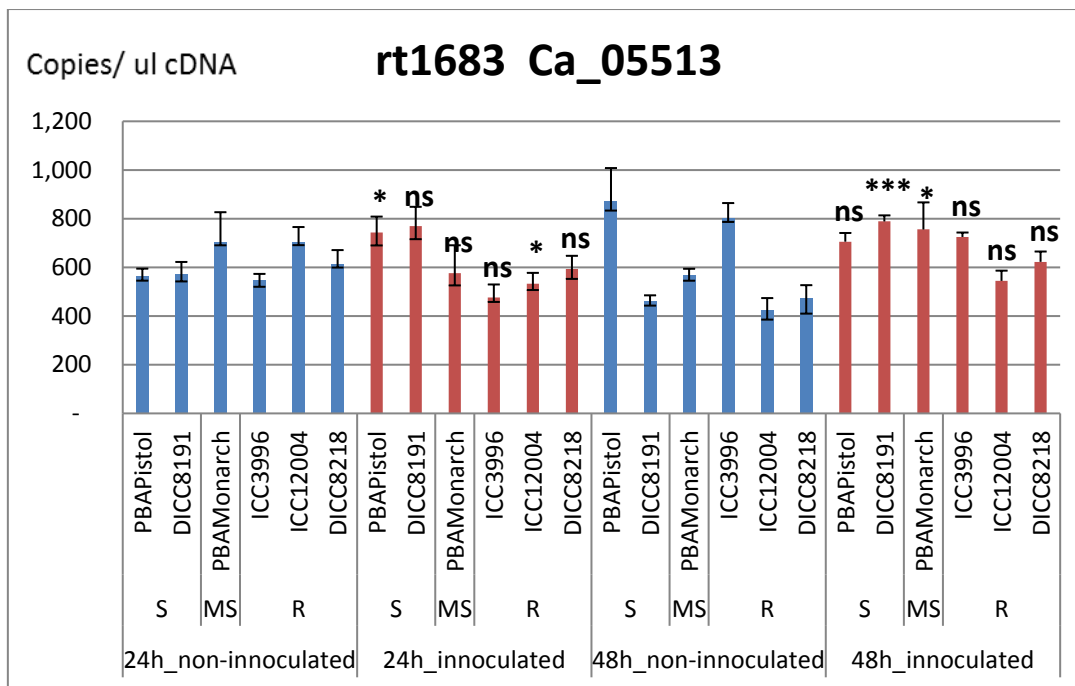

Supplementary Figure 7 **Transcriptional analysis (qPCR) of unknown gene (Ca\_05513) in AB4.1 region with 6 chickpea lines at two time points.** Blue: non-inoculated; red: inoculated with *A. rabiei*. S: Susceptible; MS: Medium Susceptible; R: Resistant. Significant difference between inoculated and non-inoculated lines are shown as \*\*\* (p-value<0.001), \* (p-value<0.05). ns: non-significant

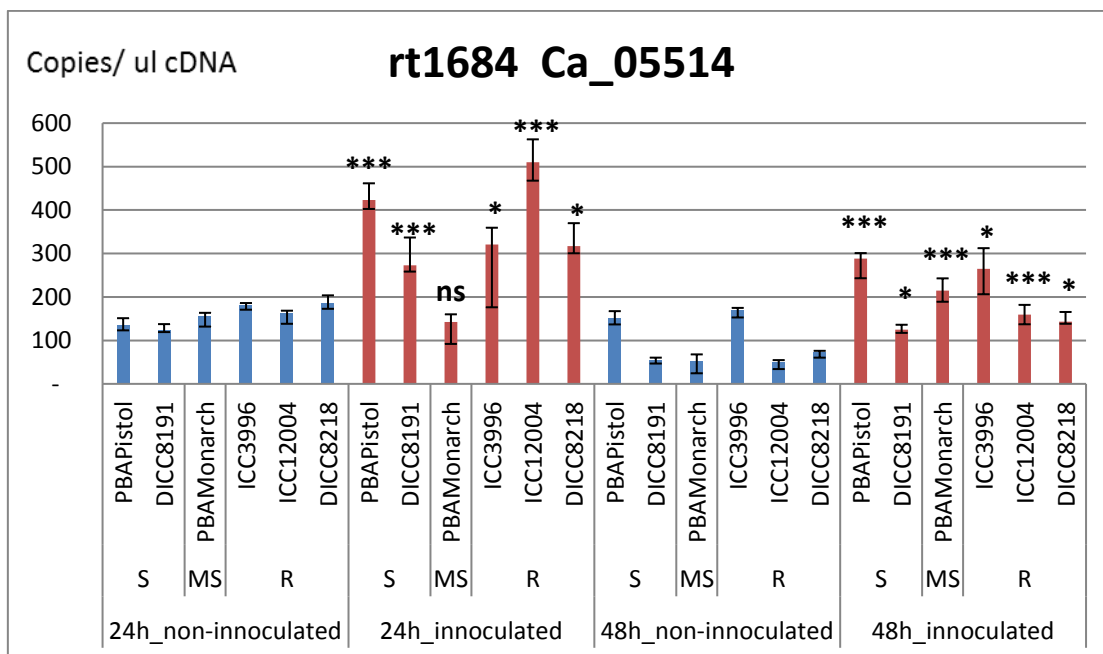

Supplementary Figure 8 **Transcriptional analysis (qPCR) of unknown gene (Ca\_05514) in AB4.1 region with 6 chickpea lines at two time points.** Blue: non-inoculated; red: inoculated with *A. rabiei*. S: Susceptible; MS: Medium Susceptible; R: Resistant. Significant difference between inoculated and non-inoculated lines are shown as \*\*\* (p-value<0.001), \* (p-value<0.05). ns: non-significant

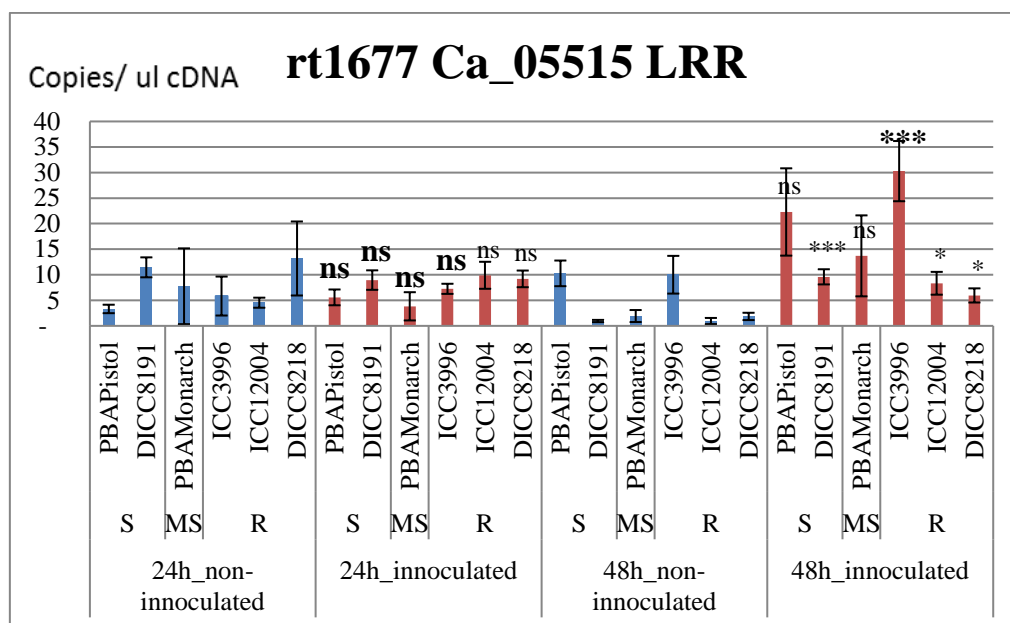

Supplementary Figure 9 **Transcriptional analysis (qPCR) of predicted gene LRR receptor-like kinase (Ca\_05515) in AB4.1 region with 6 chickpea lines at two time points.** Blue: non-inoculated; red: inoculated with *A. rabiei*. S: Susceptible; MS: Medium Susceptible; R: Resistant. Significant difference between inoculated and non-inoculated lines are shown as \*\*\* (p-value<0.001), \* (p-value<0.05). ns: non-significant

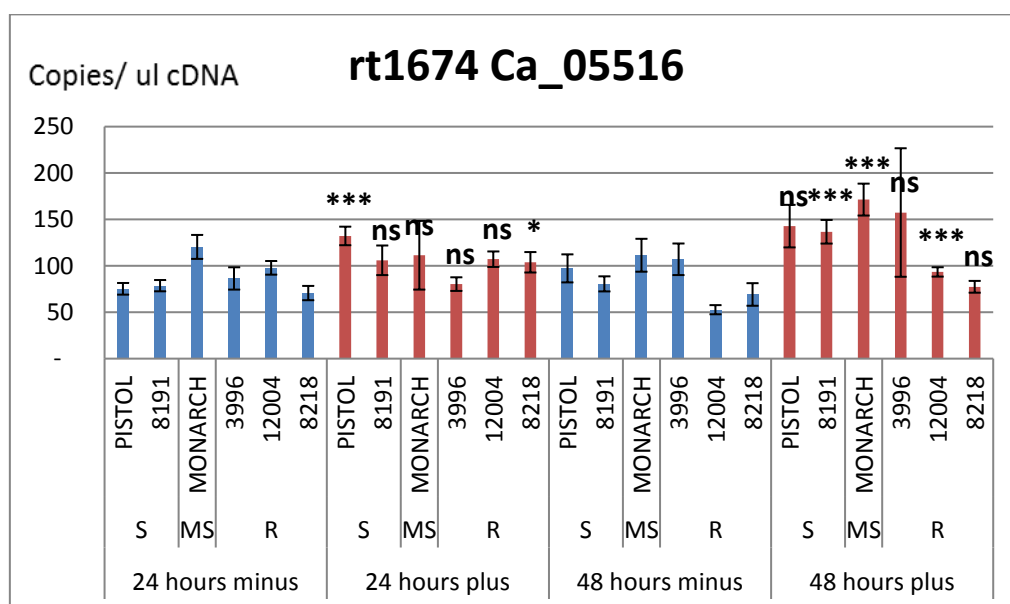

Supplementary Figure 10 **Transcriptional analysis (qPCR) of predicted gene cysteine-rich receptor-like kinase (Ca\_05516) in AB4.1 region with 6 chickpea lines at two time points.** Blue: non-inoculated; red: inoculated with *A. rabiei*. S: Susceptible; MS: Medium Susceptible; R: Resistant. Significant difference between inoculated and non-inoculated lines are shown as \*\*\* (p-value<0.001), \* (p-value<0.05). ns: non-significant

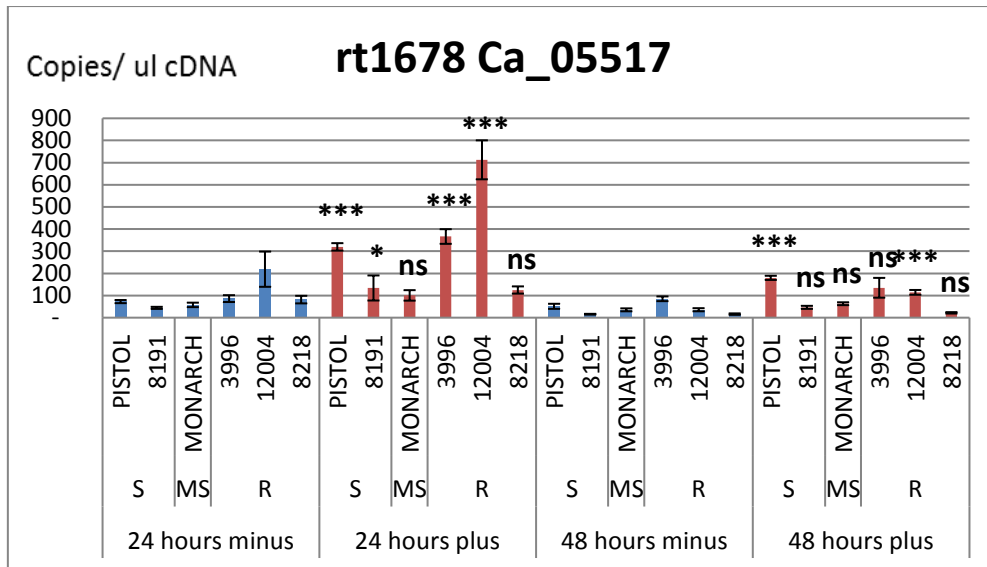

Supplementary Figure 11 **Transcriptional analysis (qPCR) of predicted gene receptor-like kinase (Ca\_05517) in AB4.1 region with 6 chickpea lines at two time points.** Blue: non-inoculated; red: inoculated with *A. rabiei*. S: Susceptible; MS: Medium Susceptible; R: Resistant. Significant difference between inoculated and non-inoculated lines are shown as \*\*\* (p-value<0.001), \* (p-value<0.05). ns: non-significant

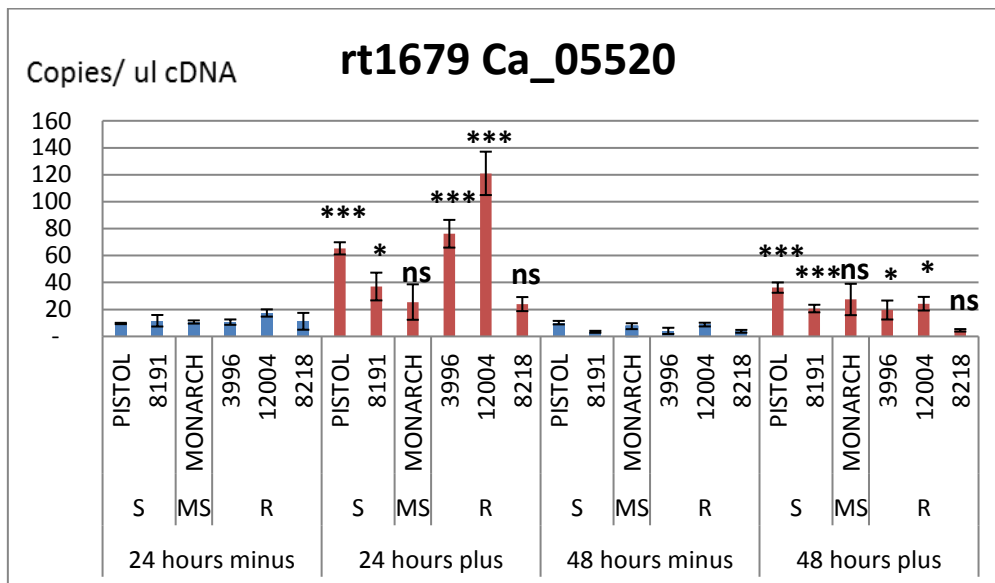

Supplementary Figure 12 **Transcriptional analysis (qPCR) of predicted gene wall associated receptor-like kinase (Ca\_05520) in AB4.1 region with 6 chickpea lines at two time points.** Blue: non-inoculated; red: inoculated with *A. rabiei*. S: Susceptible; MS: Medium Susceptible; R: Resistant. Significant difference between inoculated and non-inoculated lines are shown as \*\*\* (p-value<0.001), \* (p-value<0.05). ns: non-significant

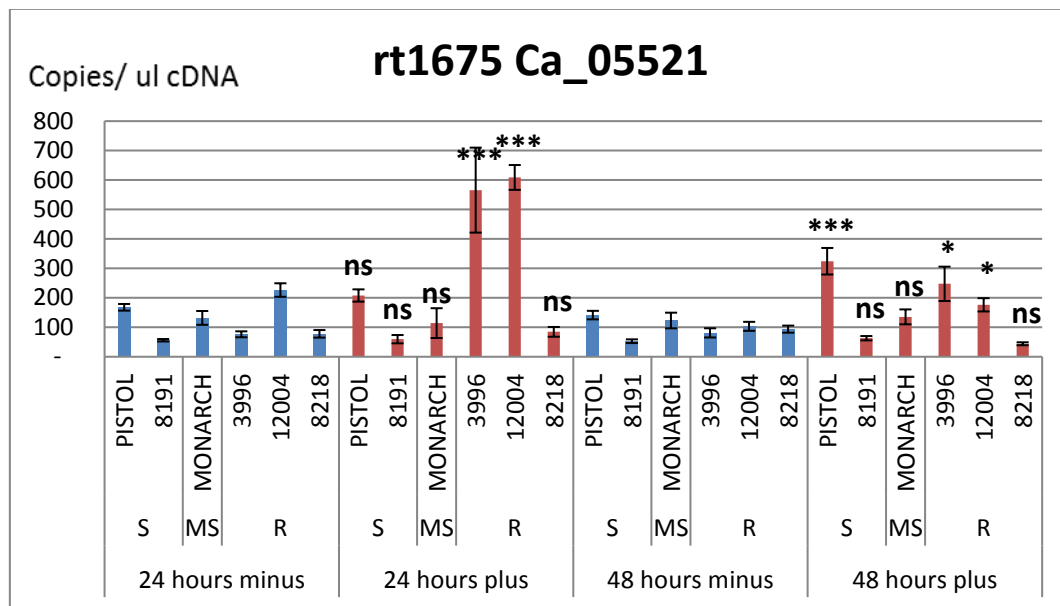

Supplementary Figure 13 **Transcriptional analysis (qPCR) of predicted gene serine/threonine receptor-like kinase (Ca\_05521) in AB4.1 region with 6 chickpea lines at two time points.** Blue: non-inoculated; red: inoculated with *A. rabiei*. S: Susceptible; MS: Medium Susceptible; R: Resistant. Significant difference between inoculated and non-inoculated lines are shown as \*\*\* (p-value<0.001), \* (p-value<0.05). ns: non-significant

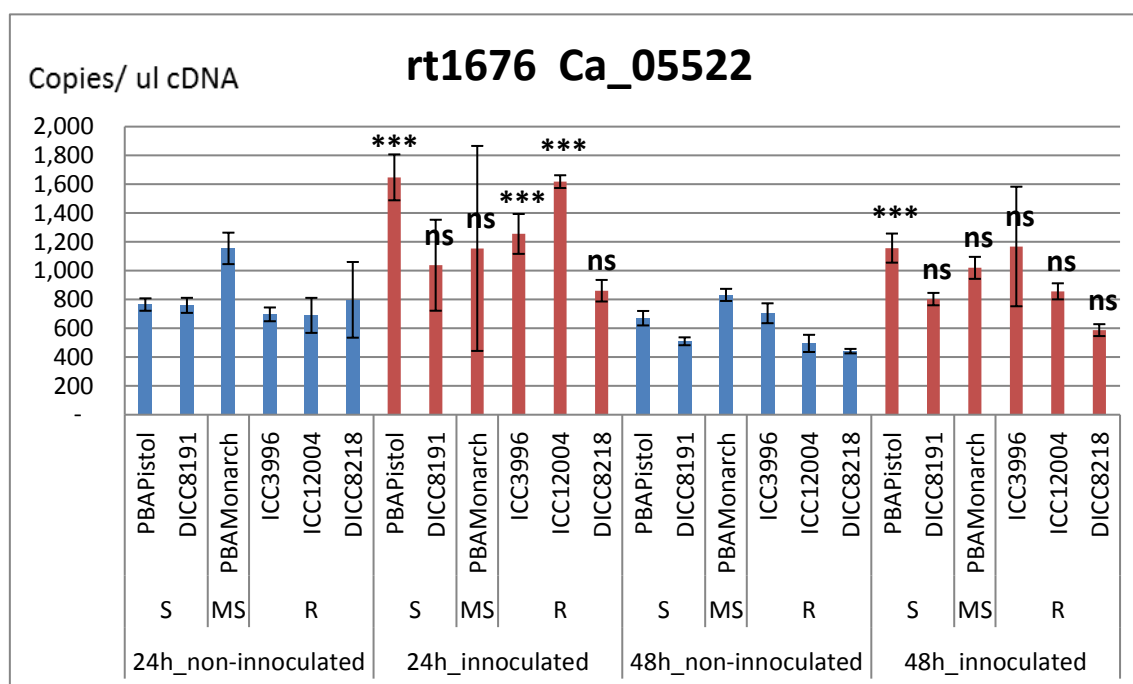

Supplementary Figure 14 **Transcriptional analysis (qPCR) of predicted gene serine/threonine receptor-like kinase (Ca\_05522) in AB4.1 region with 6 chickpea lines at two time points.** Blue: non-inoculated; red: inoculated with *A. rabiei*. S: Susceptible; MS: Medium Susceptible; R: Resistant. Significant difference between inoculated and non-inoculated lines are shown as \*\*\* (p-value<0.001), \* (p-value<0.05). ns: non-significant

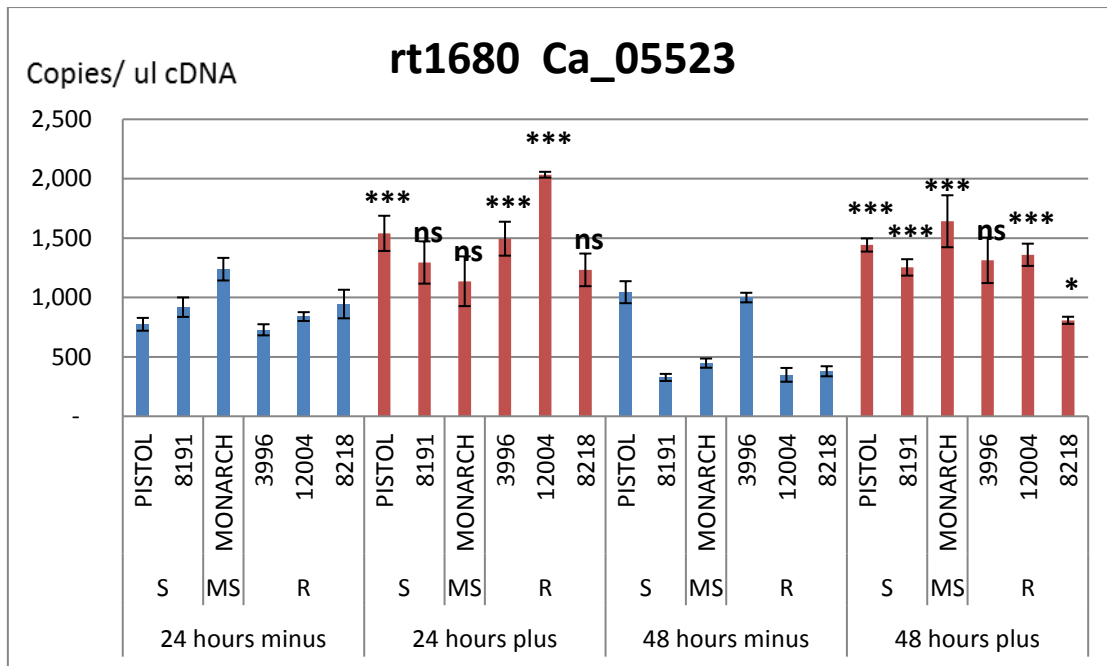

Supplementary Figure 15 **Transcriptional analysis (qPCR) of predicted gene serine/threonine receptor-like kinase (Ca\_05523) in AB4.1 region with 6 chickpea lines at two time points.** Blue: non-inoculated; red: inoculated with *A. rabiei*. S: Susceptible; MS: Medium Susceptible; R: Resistant. Significant difference between inoculated and non-inoculated lines are shown as \*\*\* (p-value<0.001), \* (p-value<0.05). ns: non-significant
